1 **Efficient prediction of a spatial transcriptomics profile better**  
2 **characterizes breast cancer tissue sections without costly**  
3 **experimentation**

4

5 Taku Monjo<sup>1†</sup>, Masaru Koido<sup>2†</sup>, Sato Nagasawa<sup>1,3</sup>, Yutaka Suzuki<sup>1</sup>, Yoichiro Kamatani<sup>1\*</sup>

6

7 <sup>1</sup> Department of Computational Biology and Medical Sciences, Graduate School of Frontier

8 Sciences, The University of Tokyo, 5-1-5, Kashiwanoha, Kashiwa-shi, Chiba, 277-8562, Japan

9 <sup>2</sup> Department of Cancer Biology, Institute of Medical Science, The University of Tokyo, 4-6-1,

10 Shirokanedai, Minato-ku, Tokyo, 108-8639, Japan

11 <sup>3</sup> Division of Breast and Endocrine Surgery, Department of Surgery, St. Marianna University School

12 of Medicine, 2-16-1, Sugao, Miyamae-ku, Kawasaki-shi, Kanagawa, 216-8511, Japan

13

14 †These authors contributed equally to this work.

15 \*Corresponding author.

16 Yoichiro Kamatani, M.D., Ph.D.

17 Laboratory of Complex Trait Genomics, Graduate School of Frontier Sciences, The University of

18 Tokyo, 4-6-1, Shirokanedai, Minato-ku, Tokyo, 108-8639, Japan

19 TEL:+81 (0)3-5449-5286 or 5280, E-mail: [kamatani.yoichiro@edu.k.u-tokyo.ac.jp](mailto:kamatani.yoichiro@edu.k.u-tokyo.ac.jp)

20

21 **Abstract**

22 Spatial transcriptomics is an emerging technology requiring costly reagents and considerable skills,  
23 limiting the identification of transcriptional markers related to histology. Here, we show that  
24 predicted spatial gene-expressions in unmeasured regions and tissues can enhance biologists'  
25 histological interpretations. We developed the Deep learning model for Spatial gene Clusters and  
26 Expression, DeepSpaCE and confirmed its performance using the spatial-transcriptome profiles and  
27 immunohistochemistry images of consecutive human breast cancer tissue sections. For example,  
28 the predicted expression patterns of *SPARC*, an invasion marker, highlighted a small tumor-invasion  
29 region that is difficult to identify using raw data of spatial transcriptome alone because of a lack of  
30 measurements. We further developed semi-supervised DeepSpaCE using unlabeled histology  
31 images and increased the imputation accuracy of consecutive sections, enhancing applicability for a  
32 small sample size. Our method enables users to derive hidden histological characters via spatial  
33 transcriptome and gene annotations, leading to accelerated biological discoveries without  
34 additional experiments. (150/150 words)

35

## 36 **Introduction**

37 Spatial transcriptomics with *in situ* capturing is an emerging technology that maps gene-expression  
38 profiles with corresponding spatial information in a tissue section<sup>1-4</sup>. A highly resolved spatial-  
39 transcriptome profile is an invaluable resource for revealing biological functions and molecular  
40 mechanisms<sup>5</sup>. Recently, many histological transcriptome profiles, measured by *in situ* capturing  
41 platforms (numerous spots with barcoded oligonucleotides on a chip), were reported in the field of  
42 oncology<sup>6,7</sup>. These profiles have helped demonstrate the complexity and heterogeneity of cancer  
43 tissues. For example, histological transcriptome profiles were used to identify high-risk invasive  
44 populations in ductal carcinoma tissues using an *in situ* capturing method<sup>8,9</sup>. However, the  
45 experimental cost of spatial transcriptomics, such as for designed chips, reagents, and sequencing,  
46 is currently high. It is also challenging to maintain the balance between the spatial resolution (i.e.,  
47 density of spots in a tissue slide) and RNA-detection efficiency with current spatial-transcriptome  
48 technology<sup>10</sup>. In addition, this technique requires practiced skills to obtain high-quality expression  
49 profiles for entire tissue slides, even when using a commercial kit such as the 10x Genomics Visium  
50 platform.

51 The convolutional neural network (CNN), a deep-learning method, is frequently used for  
52 discovering features from imaging datasets and can be used to predict image categories of interest  
53 in an end-to-end manner. For example, in the biomedical field, the CNN method has successfully

54 been used to classify lung cancer subtypes from tissue-section images without prior knowledge<sup>11</sup>.

55 Based on these recent advances, we hypothesized that applying the CNN method to spatial-

56 transcriptome profiles would enable expression-level predictions from hematoxylin and eosin

57 (H&E)-stained section images, potentially leading to an increased number of pixels by predicting

58 spatial gene-expression gaps among spots measured by spatial-transcriptome techniques (super-

59 resolution which was inspired by the recent super-resolution technique<sup>12</sup>) or imputing spatial-

60 transcriptomic patterns in unmeasured consecutive sections (tissue section imputation).

61 Here, we developed the Deep learning model for Spatial gene Clusters and Expression

62 (DeepSpaCE), which predicts spatial-transcriptome profiles from H&E-stained images using CNNs.

63 We verified the prediction accuracy of this model by comparing expression profiles from testing

64 datasets and protein-expression patterns in adjacent sections (using immunohistochemistry data),

65 which were consistent with the predictions. Based on these verifications, we applied DeepSpaCE for

66 super-resolution of spatial gene-expression levels and imputation of spatial gene-expression levels

67 in other tissue sections using human breast cancer datasets.

68

## 69 **Results**

### 70 **Overview of DeepSpaCE**

71 DeepSpaCE is composed of two parts: the training part and gene-prediction part (**Fig. 1**). The CNN

72 (VGG16 architecture) is trained with pairs of cropped section images for each spot (spot image) and  
73 its gene-expression profiles. Next, the trained model predicts gene-expression levels for at least one  
74 transcript (or transcriptomic cluster type) from spot images. We conducted two types of practical  
75 applications of DeepSpaCE using the *in situ* capturing spatial transcriptome dataset: (a) super-  
76 resolution and (b) tissue section imputation.

77 Super-resolution is used to predict unmeasured spots in the same image (e.g., images  
78 among spots whose expression profiles were measured using the *in situ* capturing platform or  
79 images on spots with section-permeabilization errors). Tissue section imputation is performed to  
80 predict spatial expression profiles of a section from a series of directly measured consecutive  
81 sections. These two applications are helpful for reducing experimental costs and clarifying biological  
82 functions at higher resolution and in three dimensions. Because substantially fewer labeled spots  
83 are available compared with general deep CNN datasets, we implemented the semi-supervised  
84 technique in DeepSpaCE to increase prediction accuracy, as described in detail below. All  
85 DeepSpaCE codes for Visium, a standardized, commercially available platform for spatial  
86 transcriptome, will be available after acceptance on the GitHub repository  
87 (<https://github.com/tmonjo/DeepSpaCE>).

88

## 89 **Preprocessing of spatial expression data**

90 We preprocessed the spatial expression data from three human breast cancer tissue sections  
91 (sections A–C) and their consecutive sections (sections D1–D3) (**Supplementary Fig. S1**). We  
92 excluded spots containing few expressed (or measured) genes to filter out spots with potential  
93 permeabilization errors, and normalized the spatial expression data to improve the training  
94 efficiency by reducing noise. Particularly, the filtering step was critical because spatial expression  
95 profiling requires very practiced skills for handling tissue slides and treating reagents  
96 homogeneously, and few expressed genes may reveal permeabilization errors in the spots. Indeed,  
97 in our spatial transcriptome datasets of human breast cancer tissues, the right bottom regions in  
98 sections D1 and D3, as well as the right upper region in section D2, showed undetected unique  
99 molecular identifiers (UMIs), indicating that section-permeabilization errors occurred in these  
100 regions (**Supplementary Fig. S2a, b**). Similarly, such undetected regions were observed in the 10x  
101 Genomics Visium demo data of human heart tissue (**Supplementary Fig. S2c**). We used these  
102 undetected spots to evaluate the performance of section imputation by DeepSpaCE, as shown  
103 below.

104

## 105 **Prediction and experimental validation of gene-expression profiles and cluster types**

106 We trained the DeepSpaCE models of three breast cancer-marker genes, estrogen receptor 1

107 (*ESR1*), erb-b2 receptor tyrosine kinase 2 (*ERBB2*), and marker of proliferation Ki-67 (*MKI67*)<sup>13,14</sup>,  
108 which were not used during the parameter-optimization procedures (see Methods). We performed  
109 the 5-fold cross-validation using section D2 as both a training and a testing set. The Pearson's  
110 correlation coefficients between the measured and predicted values were 0.588 (standard  
111 deviation [SD] = 0.025; *ESR1*), 0.424 (SD = 0.050; *ERBB2*), and 0.219 (SD = 0.041; *MKI67*)  
112 (**Supplementary Fig. S3**). Notably, comparison of *ESR1* levels in the D2 section by H&E staining  
113 highlighted undetected highly expressed spots in the upper right region of section D2, possibly  
114 because of a permeabilization error in the Visium experiment (**Fig. 2a**). This was further confirmed  
115 by determining the protein-expression pattern observed by immunohistochemical staining of the  
116 adjacent section using an *ESR1* antibody (**Fig. 2b**), which was consistent with the predicted  
117 expression levels, suggesting the applicability of our DeepSpaCE method for section imputation.

118           Next, based on the 5-fold cross-validation in section D2, we assessed the prediction  
119 accuracy of transcriptomic cluster type derived from Space Ranger software. By comparing the  
120 clusters from Space Ranger with the predicted clusters, we calculated the recall value (see  
121 Methods) of the clusters, which ranged from 35% (cluster 4) to 80% (cluster 7) (**Fig. 2c**). Briefly,  
122 although the prediction accuracy was low when comparing non-cancerous regions (e.g., clusters 1  
123 and 4), the cluster types between cancer sites and non-cancer sites were clearly distinguishable  
124 (e.g., clusters 1 and 3). Similar to the findings described in the previous paragraph, the cluster type

125 was predicted in the unmeasured upper right region of section D2, which showed a  
126 permeabilization error (**Fig. 2d**). The predicted types of clusters in this region were plausible based  
127 on the spatial transcriptome and DeepSpaCE analysis using the adjacent sections D1 and D3, which  
128 could measure the region (**Supplementary Fig. S4**).

129

### 130 **Super-resolution of spatial gene expression**

131 We performed super-resolution for *ESR1* in the images of spots measured in section C  
132 (**Supplementary Fig. S5a, b**). Section C was used as both a training and test set to generate a super-  
133 resolved image as an example. The super-resolved image of *ESR1* expression in section C was  
134 consistent with the results of immunohistochemical staining, supporting that DeepSpaCE enables  
135 accurate high-resolution observations of expression profiles (**Supplementary Fig. S5c**). Notably, we  
136 found a region with low *ESR1* expressions in the super-resolved image, which was not clearly  
137 observed in the original spatial transcriptome datasets (**Supplementary Fig. S5b**), confirming the  
138 importance of super-resolution.

139 We focused on secreted protein acidic and cysteine rich (*SPARC*), a potential cancer-  
140 invasion marker, and assessed whether the super-resolution method could facilitate biological  
141 interpretations provided by pathologists based on histology patterns in H&E-stained images. After  
142 training and validating the DeepSpaCE model (**Supplementary Fig. S6**), we predicted *SPARC*-



143 expression levels among the original spots in section D2 (**Fig. 3a, b**). Although the color tones  
144 themselves did not explain the *SPARC* expression patterns in the H&E-stained images, the patterns  
145 were successfully predicted by the DeepSpaCE model. Comparison of the super-resolved image of  
146 *SPARC* with the H&E-stained image showed that the invasive tumor region overlapped substantially  
147 with the distribution of *SPARC* expression (**Fig. 3c**), whereas such patterns were not apparent from  
148 the color tones in the original spatial-transcriptome data. *SPARC* is secreted into the extracellular  
149 matrix from cancer and stromal cells, and high *SPARC*-mRNA expression is related to metastasis and  
150 poor prognosis in several types of cancers<sup>15</sup>. Thus, the super-resolved *SPARC*-expression image  
151 highlighted the potential tumor-invasion region and made it easier to identify by a non-pathologist  
152 in cases where a given transcript's function is known.

153

#### 154 **Imputation of a tissue section using semi-supervised learning**

155 To assess whether semi-supervised learning can improve the prediction accuracy of DeepSpaCE, we  
156 performed tissue section imputation for section D2 using the model trained by sections D1 and D3  
157 (randomly selected 80% spots were used as training data and others were used as validation data).  
158 After training the teacher model (first trained model), we developed student models 1–5 by  
159 performing five rounds of semi-supervised learning using breast cancer section images (section A–  
160 C) as unlabeled images. We selected the most predictive student model in the validation data as the

161 best model. We found an increasing trend in the Pearson's correlation coefficients between the  
162 measured and predicted expression levels, as expected (**Supplementary Table S1**). In the teacher  
163 model, the mean Pearson's correlation coefficient for 21 genes was 0.369. The mean Pearson's  
164 correlation coefficients progressively increased for student model 1 (0.414), student model 2  
165 (0.455), student model 3 (0.438), student model 4 (0.457), and student model 5 (0.458) (**Fig. 3d**).  
166 For *SPARC*, Pearson's correlation coefficient increased from 0.509 (SD = 0.069; teacher model) to  
167 0.616 (SD = 0.067; student model 4). For *MXRA5*, the Pearson's correlation coefficient was not  
168 increased after analysis using student model 1, although it was increased from 0.501 (SD = 0.083;  
169 teacher model) to 0.527 (SD = 0.093; student model 1). Thus, the semi-supervised learning method  
170 may increase the accuracy of DeepSpaCE through additional computational costs.

171 To verify whether their related unlabeled images could improve the accuracy of the  
172 DeepSpaCE model, we performed semi-supervised learning with permuted gene-expression  
173 levels or randomized the values as negative controls. The Pearson's correlation coefficients did not  
174 increase, but rather decreased, when permuted or randomized values were used. Moreover,  
175 Pearson's correlation coefficients did not increase when irrelevant images of dogs or cats (obtained  
176 from ImageNet) were used for semi-supervised learning. Furthermore, Pearson's correlation  
177 coefficients did not increase when breast cancer section images obtained from The Cancer Genome  
178 Atlas (TCGA) were used for semi-supervised learning (**Fig. 3e**).

## 179 **Discussion**

180 In this study, we proposed performing super-resolution and section imputation with DeepSpaCE  
181 and validated the accuracy from cross-validation and immunohistostaining. These approaches made  
182 it possible to derive more knowledge from existing spatial transcriptome datasets. As a compelling  
183 example, the relationship between *SPARC* expression and cancer invasion was highlighted via super-  
184 resolution, whereas detecting the invasive region using original spatial transcriptome data was  
185 difficult because the measured spots were not dense (**Fig. 3a, b**). The *SPARC* glycoprotein has a high  
186 affinity for albumin, and macrophage-derived *SPARC* contributes to metastasis by acting at the step  
187 of integrin-mediated migration of invasive cells<sup>15</sup>. Previously, *SPARC* mRNA expression was reported  
188 as a predictor of a pathological complete response after neoadjuvant nab-paclitaxel therapy<sup>16</sup>. Our  
189 study underscored the relationship between *SPARC* expression and invasive regions, which may be  
190 clinically important for treating breast cancer. This interpretation does not require expertise in  
191 histology or pathology but requires gene annotations, with should be familiar to researchers of  
192 spatial transcriptome. In addition, super-resolution in section C identified the region with low  
193 expressed *ESR1*, the amplification of which is frequently observed in proliferative breast cancers<sup>13</sup>.  
194 Although it is unclear whether the region indicates the heterogeneity of breast cancer tissues or  
195 existence of normal tissues, this region was unclear in the original spatial transcriptome data and  
196 expression in adjacent sections was experimentally validated.

197 For super-resolution and section imputation, we developed DeepSpaCE to predict  
198 expression levels from spot images from Visium. This spot-level analysis should reveal more  
199 detailed patterns than those obtained by CNN using pairs of images of the bulk transcriptome<sup>17</sup> by  
200 resolving spatial expression patterns. DeepSpaCE requires a minimum of a single experiment to  
201 analyze the spatial transcriptome; nevertheless, the predictions were well-validated by cross-  
202 validation and experimental analysis. DeepSpaCE as well as super-resolution and section imputation  
203 methods aim to maximize the value of existing datasets and provide foundations for subsequent  
204 experiments from at least a single dataset without additional experimental costs. This is an  
205 important difference from the recently proposed STNet study in which trained spatial transcriptome  
206 data (not from the Visium platform) was obtained from as many as 23 individuals<sup>18</sup>.

207 The number of training datasets used for single spatial transcriptome analysis (maximum  
208 4,992 spots/slide with the Visium platform) was not sufficient for training the CNN in general, as a  
209 previous study used ~557,000 images from 830 slides to predict lung cancer subtypes and ~212,000  
210 images from ~320 slides to predict lung cancer gene mutations<sup>11</sup>. To increase the ability to apply  
211 DeepSpaCE to many datasets for which it is challenging to train the connections between H&E-  
212 stained images and expression levels, we implemented a semi-supervised learning method<sup>19</sup> in  
213 DeepSpaCE. The DeepSpaCE model with semi-supervised learning using sections A–C as unlabeled  
214 images showed better performance than a simple prediction model using only experimentally

215 obtained spatial transcriptome data. Although we increased the predictive accuracy of tissue  
216 section imputation in this case, the Pearson's correlation coefficients were not improved when  
217 using breast cancer H&E-stained images obtained from TCGA as unlabeled images. This may be  
218 because the DeepSpaCE model is sensitive to the protocol for obtaining the H&E images (i.e., batch  
219 effects disturb the training steps). Therefore, the model that gives the performs the best prediction  
220 accuracy when using semi-supervised learning as an option should be determined. In conclusion,  
221 DeepSpaCE is an all-in-one package that augments spatial transcriptome data obtained from the *in*  
222 *situ* capturing platform; its applications can improve the understanding of histological expression  
223 profiles.  
224

## 225 **Methods**

### 226 **Ethical approval**

227 Breast tissue samples and relevant clinical data were obtained from patients undergoing surgery at  
228 St. Marianna University School of Medicine Hospital after obtaining approval from the Clinical  
229 Ethics Committee of St. Marianna University (approval number: 2297-i103). The approval allowed  
230 the retrieval of surgical pathology tissues that were obtained with informed consented or that were  
231 approved for use with a waiver of consent.

232

### 233 **Spatial-transcriptomics datasets**

234 We used six human breast cancer tissue sections, including sections A–C and consecutive sections  
235 D1–D3, which were derived from one patient. The spatial transcriptomics experiments were  
236 conducted with the same protocol reported in Nagasawa et al.<sup>8</sup>. Briefly, the tissue sections were  
237 stained with H&E, and TIFF images were obtained using a microscope at 10× magnification. Spatial-  
238 transcriptome profiling was performed using the Visium platform with the standard protocol  
239 provided by 10x Genomics (Pleasanton, CA, USA). UMI counts were calculated using 10x Genomics  
240 Space Ranger software (version 1.0.0). Visium demo data (version 1.0.0) for the human heart tissue  
241 was obtained from the 10x Genomics website  
242 (<https://www.10xgenomics.com/resources/datasets/>).

243

#### 244 **Preprocessing of spatial gene-expression data**

245 Regarding the spatial-transcriptome profiles obtained from the Space Ranger pipeline (10x  
246 Genomics), we removed spots with low total UMI counts (<1,000) or a low number of measured  
247 genes (<1,000). The SCTransform function of Seurat package (version 3.1.4)<sup>20</sup> was applied to  
248 normalize the UMI counts, based on regularized negative binomial regression<sup>21</sup>. Min-max scaling  
249 was performed to adjust the expression values between zero and one. We trained 24 genes  
250 including three breast cancer-marker genes (*MKI67*, *ESR1*, *ERBB2*) and 21 breast cancer-related  
251 microenvironment marker genes (*SPARC*, *IFI27*, *COL10A1*, *COL1A2*, *COL3A1*, *COL5A2*, *FN1*, *POSTN*,  
252 *CTHRC1*, *COL1A1*, *THBS2*, *PDGFRL*, *COL8A1*, *SULF1*, *MMP14*, *ISG15*, *IL32*, *MXRA5*, *LUM*, *DPYSL3*, and  
253 *CTSK*). These 21 genes were manually selected from the cluster of genes overexpressed in the  
254 breast cancer-related microenvironment region. These two gene sets of three genes and 21 genes  
255 were respectively used in the training part of DeepSpaCE. The graph-based clustering algorithm<sup>22</sup>  
256 implemented in Space Ranger was used for transcriptomic cluster type prediction.

257

#### 258 **Preprocessing of tissue section images**

259 Each spot image was cropped from a tissue slide image, based on the position table in the Space  
260 Ranger outputs (**Supplementary Table S2**). We filtered out whitish images in which more than half

261 of the pixels were the >80% percentiles of mean RGB values, as shown below. For image  
262 augmentation, we randomly applied image-transform functions of flipping (RandomRotate90, Flip,  
263 and Transpose), cropping (RandomResizedCrop), noise (IAAAdditiveGaussianNoise and  
264 GaussNoise), blurring (MotionBlur, MedianBlur, and Blur), distortion(OpticalDistortion,  
265 GridDistortion, IAAPiecewiseAffine, and ShiftScaleRotate), contrast (RandomContrast,  
266 RandomGamma, and RandomBrightness), and color-shifting (HueSaturationValue, ChannelShuffle,  
267 and RGBShift) in Albumentations library (version 0.4.5)<sup>23</sup>.

268

#### 269 **Preprocessing of images obtained from TCGA and ImageNet**

270 We obtained 1,978 images of H&E-stained TCGA breast cancer sections from the GDC Data Portal  
271 (<https://portal.gdc.cancer.gov>) on August 05, 2020. As negative controls, we obtained 14,500  
272 irrelevant images such as dogs and cats (n02106662, n02110341, n02116738, n02123045,  
273 n02123159, n02123394, n02123597, n02124075, n02497673, and n03218198) from ImageNet  
274 (<http://www.image-net.org>) on October 09, 2020. All images obtained from TCGA and ImageNet  
275 were cropped to 224 × 224 pixels (**Supplementary Fig. S7**). Four thousand cropped images were  
276 randomly selected as unlabeled images for each semi-supervised learning model.

277



278 **Training and prediction of gene-expression profiles and transcriptomic cluster types**

279 All deep-learning models were implemented using deep-learning framework PyTorch (version  
280 1.5.1)<sup>24</sup>. We adapted the VGG16 architecture for deep CNN model that has 16 weight layers<sup>25</sup>. We  
281 modified the number of output features in VGG16 from 1,000 to the number of genes or cluster  
282 types. We simultaneously trained multi genes such as three genes of breast cancer markers or 21  
283 breast cancer-related microenvironment markers. For transcriptomic cluster type predictions, the  
284 loss value of the training DeepSpaCE dataset was calculated using the CrossEntropyLoss function.  
285 For gene-expression predictions, the loss value was determined as the sum of loss calculated with  
286 the SmoothL1Loss function for each gene. As an optimizer, we used Adam<sup>26</sup> with the  
287 hyperparameters of learning rate: 1e-4 and weight decay: 1e-4. Each training was repeated for 50  
288 epochs to stabilize the loss curves (**Supplementary Fig. S8**). Early stopping was applied if the loss  
289 value for the validation data did not decrease over five continuous epochs. To evaluate the accuracy  
290 of cluster type prediction, we used the recall value which reflects the proportion of positives  
291 identified correctly among the actual number of positives (recall = true positive / (true positive +  
292 False negative)). For section D2, cluster 8 was excluded from the training set because it consists of a  
293 region of permeabilization errors.

294

295 **Parameter optimization of DeepSpaCE**

296 We optimized the parameters of DeepSpaCE, such as the image size, image-filtering threshold, and  
297 image-augmentation methods. We performed 5-fold cross-validation using six sections (A–C, and  
298 D1–D3) to evaluate the prediction accuracy. We developed prediction models for the expression  
299 levels of the 21 breast cancer-related microenvironment marker genes (described above) because  
300 these genes are representative markers of heterogeneous ductal carcinoma tissues. First, we  
301 assessed the impact of the size of the input images (0%, 50%, 100%, 150%, and 200%; relative to  
302 the original spot image size) on the prediction accuracies; the results showed that an image size of  
303 150% gave better outcomes than the original and smaller image sizes (**Supplementary Fig. S9a**).  
304 This result is biologically plausible because the surrounding cells can communicate with cells in the  
305 spot and affect their gene-expression levels. Second, we assessed the different image-filtering  
306 thresholds to exclude uninformative images (i.e., excluding almost white images). We calculated  
307 whiteness for each spot by calculating the mean RGB values and obtained the percentiles (50%,  
308 60%, 70%, 80%, 90%, and 100%) over spots in a slide. We filtered out images in which more than  
309 half of the pixels were the >80% percentiles of mean RGB values as judged from the histogram  
310 (**Supplementary Fig. S9b**). This strategy maximized the prediction accuracy (**Supplementary Fig.**  
311 **S9c**). Third, to further improve accuracy, we augmented images with various image transformations  
312 such as flipping, cropping, blurring, distortion, noise, contrast, and color-shifting (**Supplementary**

313 **Fig. S10**). All image augmentation (except for color-shifting) improved the Pearson's correlation  
314 coefficients compared with using non-augmented images (**Supplementary Fig. S9d**); however, we  
315 also used the color-shifting method because H&E-staining on different slides may change the color  
316 tones.

317

### 318 **Super-resolution of spatial gene expression**

319 To impute the expression levels among spots on a slide image, new spot image files were created by  
320 cropping around three adjacent spots (**Supplementary Fig. S11**). We used sections C and D2 as both  
321 the training and test sets (randomly selected 80% spots were used as training data and others were  
322 used as test data). By performing super-resolution, the numbers of spots increased from 2,238 to  
323 6,733 and from 2,168 to 6,623 in sections C and D2, respectively. We trained the both of three  
324 breast cancer-marker genes and 21 breast cancer-related microenvironment marker genes,  
325 respectively. Semi-supervised learning was not used for super-resolution.

326

### 327 **Imputation of a tissue section using semi-supervised learning**

328 Sections D1–D3 were obtained as consecutive sections. Thus, sections D1 and D3 were used as the  
329 training set. Section D2 was used as the test set to impute gene-expression levels because it was  
330 located between sections D1 and D3. Sections A–C were used for semi-supervised training as

331 unlabeled images. In the noisy student model<sup>27</sup>, gene-expression levels in unlabeled images were  
332 predicted using the first trained model (teacher model). Four thousand predicted proxy labels and  
333 the associated images were added to the original dataset and used to train the next model, which  
334 was designated as a student model. The training student models were run five times  
335 (**Supplementary Fig. S12a**). In addition to the spot images of section A–C, we used images of breast  
336 cancer sections obtained from TCGA as unlabeled images. Irrelevant images obtained from  
337 ImageNet were used as negative controls during semi-supervised learning. In addition, we also  
338 performed semi-supervised learning with permuted gene expression and random values as  
339 negative controls (**Supplementary Fig. S12b**).

340

#### 341 **Immunohistochemistry and measurement of protein expression**

342 Breast cancer tissues were frozen and embedded in optimal cutting temperature compound (Sakura  
343 Finetek, Tokyo, Japan). Ten-micrometer-thick sections were cut onto slides using a Leica CM3050 S  
344 cryostat (Wetzlar, Germany), fixed in methanol at -20°C for 20 min, and air-dried for 60 min.  
345 Endogenous peroxidase activity was blocked in phosphate-buffered saline containing 3% H<sub>2</sub>O<sub>2</sub> for 5  
346 min. For *ESR1* staining, the sections were incubated with an anti-*ESR1* antibody (FLEX Monoclonal  
347 Rabbit Anti-Human Estrogen Receptor  $\alpha$ , Agilent technologies, Dako, Glostrup, Denmark) at a 1:2  
348 dilution for 60 min at room temperature. Antibody labeling was detected with the Histofine Simple

349 Stain, MULTI (Nichirei Bioscience, Tokyo, Japan) following the manufacturer's protocol, and all

350 sections were counterstained with H&E.

351

### 352 **Data processing and analysis**

353 Python (version 3.6.5) was used for preprocessing and implementation of DeepSpaCE with the

354 libraries, torch (version 1.5.1), torchvision (version 0.6.1), numpy (version 1.19.0), pandas (version

355 1.0.5), scikit-learn (version 0.23.1), mlxtend (version 0.17.2), albumentations (version 0.4.5),

356 opencv-python (version 4.2.0.34), and matplotlib (version 3.2.2). R (version 3.6.0) was used for

357 statistical analysis and visualization with the packages, dplyr (version 1.0.2), data.table (version

358 1.12.8), Matrix (version 1.2.17), grid (version 3.6.0), rjson (version 0.2.20), hdf5r (version 0.9.7),

359 readbitmap (version 0.1.5), ggplot2 (version 3.3.0), hrbrthemes (version 0.8.0), ggsci (version 2.9),

360 ggpubr (version 0.4.0), cowplot (version 1.0.0), and Seurat (version 3.1.4.9904).

361

362

## 363 **References**

- 364 1. Ståhl, P. L. *et al.* Visualization and analysis of gene expression in tissue sections by spatial  
365 transcriptomics. *Science*. **353**, 78–82 (2016).
- 366 2. Rodriques, S. G. *et al.* Slide-seq: A scalable technology for measuring genome-wide expression at  
367 high spatial resolution. *Science*. **363**, 1463–1467 (2019).
- 368 3. Maniatis, S. *et al.* Spatiotemporal dynamics of molecular pathology in amyotrophic lateral  
369 sclerosis. *Science*. **364**, 89–93 (2019).
- 370 4. Marx, V. Method of the Year: spatially resolved transcriptomics. *Nat. Methods* **18**, 9–14 (2021).
- 371 5. Bergenstråhle, L. *et al.* Super-resolved spatial transcriptomics by deep data fusion. *bioRxiv*  
372 (2020).
- 373 6. Thrane, K., Eriksson, H., Maaskola, J., Hansson, J. & Lundeberg, J. Spatially resolved  
374 transcriptomics enables dissection of genetic heterogeneity in stage III cutaneous malignant  
375 melanoma. *Cancer Res*. **78**, 5970–5979 (2018).
- 376 7. Berglund, E. *et al.* Spatial maps of prostate cancer transcriptomes reveal an unexplored  
377 landscape of heterogeneity. *Nat. Commun.* **9**, 1–13 (2018).
- 378 8. Nagasawa, S. *et al.* Genomic profiling reveals heterogeneous populations of ductal carcinoma in  
379 situ of the breast. *Commun. Biol.* **4**, 1–13 (2021).
- 380 9. Yoosuf, N., Navarro, J. F., Salmén, F., Ståhl, P. L. & Daub, C. O. Identification and transfer of

- 381 spatial transcriptomics signatures for cancer diagnosis. *Breast Cancer Res.* **22**, 1–10 (2020).
- 382 10. Asp, M., Bergenstråhle, J. & Lundeberg, J. Spatially resolved transcriptomes—next generation  
383 tools for tissue exploration. *BioEssays* **42**, 1–16 (2020).
- 384 11. Coudray, N. *et al.* Classification and mutation prediction from non–small cell lung cancer  
385 histopathology images using deep learning. *Nat. Med.* **24**, 1559–1567 (2018).
- 386 12. Nasrollahi, K. & Moeslund, T. B. Super-resolution: a comprehensive survey. *Machine Vision and*  
387 *Applications* **25**, 1423–1468 (2014).
- 388 13. Holst, F. *et al.* Estrogen receptor alpha (ESR1) gene amplification is frequent in breast cancer.  
389 *Nat. Genet.* **39**, 655–660 (2007).
- 390 14. Goldhirsch, A. *et al.* Personalizing the treatment of women with early breast cancer: Highlights  
391 of the st gallen international expert consensus on the primary therapy of early breast Cancer  
392 2013. *Ann. Oncol.* **24**, 2206–2223 (2013).
- 393 15. Sangaletti, S. *et al.* Macrophage-derived SPARC bridges tumor cell-extracellular matrix  
394 interactions toward metastasis. *Cancer Res.* **68**, 9050–9059 (2008).
- 395 16. Nakazawa, Y. *et al.* The pathological complete response and secreted protein acidic and rich in  
396 cysteine expression in patients with breast cancer receiving neoadjuvant nab-paclitaxel  
397 chemotherapy. *Oncol. Lett.* **19**, 2705–2712 (2020).
- 398 17. Schmauch, B. *et al.* A deep learning model to predict RNA-Seq expression of tumours from

- 399 whole slide images. *Nat. Commun.* **11**, 1–15 (2020).
- 400 18. He, B. *et al.* Integrating spatial gene expression and breast tumour morphology via deep  
401 learning. *Nat. Biomed. Eng.* **4**, 827–834 (2020).
- 402 19. Ouali, Y., Hudelot, C. & Tami, M. An overview of deep semi-supervised learning. *arXiv* (2020).
- 403 20. Stuart, T. *et al.* Comprehensive integration of single-cell data. *Cell* **177**, 1888–1902 (2019).
- 404 21. Hafemeister, C. & Satija, R. Normalization and variance stabilization of single-cell RNA-seq data  
405 using regularized negative binomial regression. *Genome Biol.* **20**, 1–15 (2019).
- 406 22. Blondel, V. D., Guillaume, J. L., Lambiotte, R. & Lefebvre, E. Fast unfolding of communities in  
407 large networks. *arXiv* (2008).
- 408 23. Buslaev, A. *et al.* Albuementations: Fast and flexible image augmentations. *Information* **11**, 1–20  
409 (2020).
- 410 24. Stevens, E., Antiga, L. & Viehmann, T. Deep learning with PyTorch. *Manning Publications* (2020).
- 411 25. Simonyan, K. & Zisserman, A. Very deep convolutional networks for large-scale image  
412 recognition. *arXiv* (2015).
- 413 26. Kingma, D. P. & Ba, J. L. Adam: A method for stochastic optimization. *arXiv* (2015).
- 414 27. Xie, Q., Luong, M. T., Hovy, E. & Le, Q. V. Self-training with noisy student improves ImageNet  
415 classification. *arXiv* (2020).
- 416



417 **Code availability**

418 All codes for DeepSpaCE are available on GitHub (<https://github.com/tmonjo/DeepSpaCE>) (*will be*  
419 *available after acceptance*). These codes include image-preprocessing procedures and expression  
420 data produced from Space Ranger.

421

422 **Data availability**

423 All sequencing data and pathological images for Visium have been deposited in the DNA Data Bank  
424 of Japan under the accession number xxx (*under registration*).

425

426 **Acknowledgments**

427 The super-computing resource provided by the Human Genome Center (The University of Tokyo)  
428 and AI Bridging Cloud Infrastructure (ABCI), provided by the National Institute of Advanced  
429 Industrial Science and Technology (AIST), were used to develop and validate DeepSpaCE.

430

431 **Author Contributions**

432 TM, MK, and YK conceived the study and analyzed the data. TM developed and implemented the  
433 DeepSpaCE algorithm. SN and YS contributed to the Visium data acquisition. SN contributed to the  
434 immunohistochemistry experiments. TM and MK wrote the manuscript with critical input from SN,  
435 YS, and YK.

436 **Competing Interests**

437 The authors declare no conflicts of interest.

438

439 **Figures**

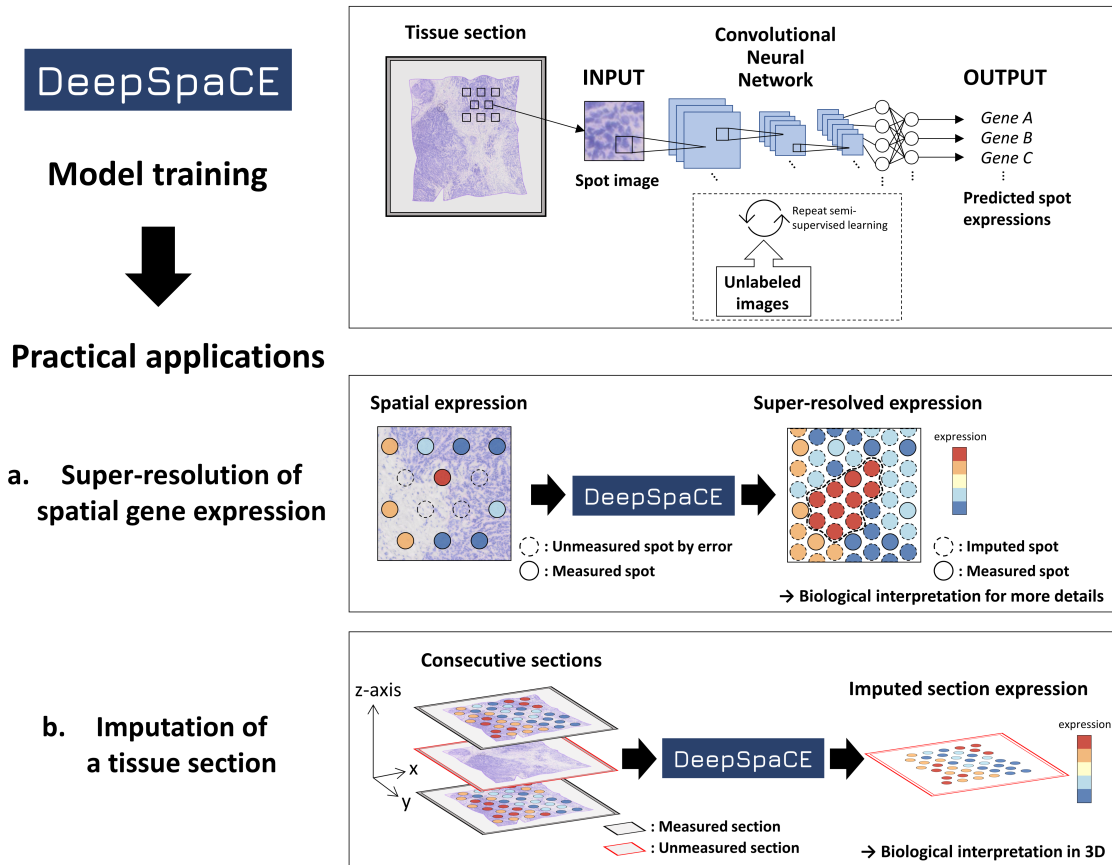

440

441

442 **Figure 1** Overview of DeepSpaCE. Deep learning model for Spatial gene Clusters and Expression

443 (DeepSpaCE) is a method for predicting gene-expression levels and transcriptomic cluster types from

444 tissue spot images. DeepSpaCE is composed of two parts: the model training part and gene-

445 prediction part. In the case of using semi-supervised learning as an option, unlabeled images are used

446 to improve the prediction accuracy with predicted proxy labels. As practical applications of

447 DeepSpaCE, we conducted super-resolution of spatial gene expression and tissue section imputation.

448 (a) Super-resolution was used for predictions with unmeasured spot images (e.g., images among

449 spots whose expression profiles were measured using the *in situ* capturing platform or images on  
450 spots with technical errors). Left spatial expression pattern shows that some spots are lacks of  
451 expression value because of a technical problem such as permeabilization error (dotted circle). Right  
452 image shows an additional spatial expression pattern imputed by DeepSpaCE, and its highly  
453 expressed region in the center of the section (dotted line). It is challenging to infer a functional  
454 boundary such as cancer infiltration from spatial expression profiles of sparse spots (left). Spatial  
455 expression profiles of dense spots imputed by DeepSpaCE and their gene annotations enable to  
456 delineate a functional boundary clearly. **(b)** Tissue section imputation was used to predict gene-  
457 expression levels in one of tissue section within consecutive sections. By using DeepSpaCE, the  
458 unmeasured spatial expression profiles of the slide (red frame) can be imputed by at least one  
459 adjacent slide (black frame) whose expression profiles were measured using the *in situ* capturing  
460 platform.  
461

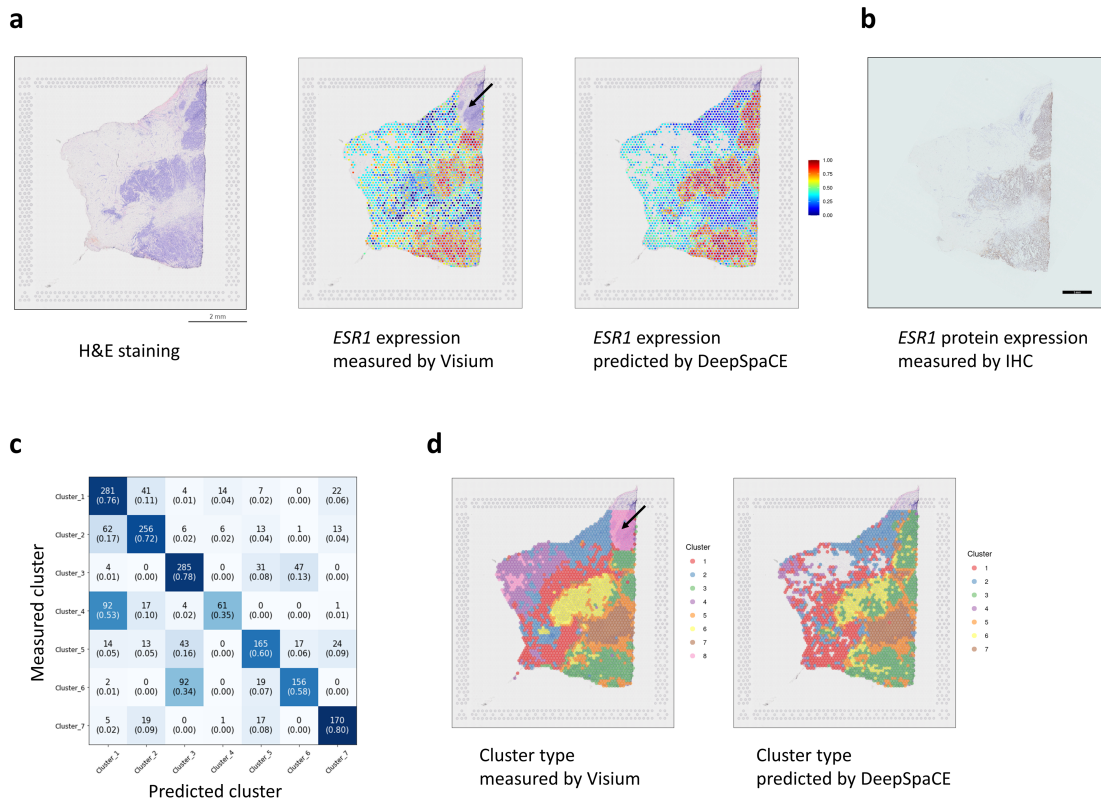

462

463

464 **Figure 2** DeepSpaCE predicts spatial gene expression and cluster types. (a) Left image shows section

465 D2 after hematoxylin and eosin (H&E) staining. Middle image shows a heatmap of normalized *ESR1*

466 expression in section D2, measured using the 10x Genomics Visium platform. *ESR1* expression in the

467 upper right region (black arrow) of section D2 could not be measured because of permeabilization

468 errors. Right image shows the heatmap of *ESR1* expression in section D2, predicted by DeepSpaCE.

469 The blank areas represent spots that were excluded because of a small amount of information. (b)

470 Image showing immunohistochemical staining of *ESR1* protein in the adjacent section of section D2.

471 (c) Heatmap shows the confusion matrix of the measured and predicted cluster types. The number

472 in each box is the number of labels, and the number inside each pair of parentheses is the recall value.

473 (d) Left image shows a heatmap of transcriptomic cluster types in section D2, as measured using the

474 Visium platform. The cluster types in the upper right region (black arrow) of section D2 were not

475 determined because of permeabilization errors. Right image shows the heatmap of cluster types in

476 section D2, predicted by DeepSpaCE. Blank areas represent spots that were excluded because of low

477 information. For training and gene prediction parts, we excluded cluster 8 because most of the region

478 belonging to the cluster showed permeabilization errors.

479

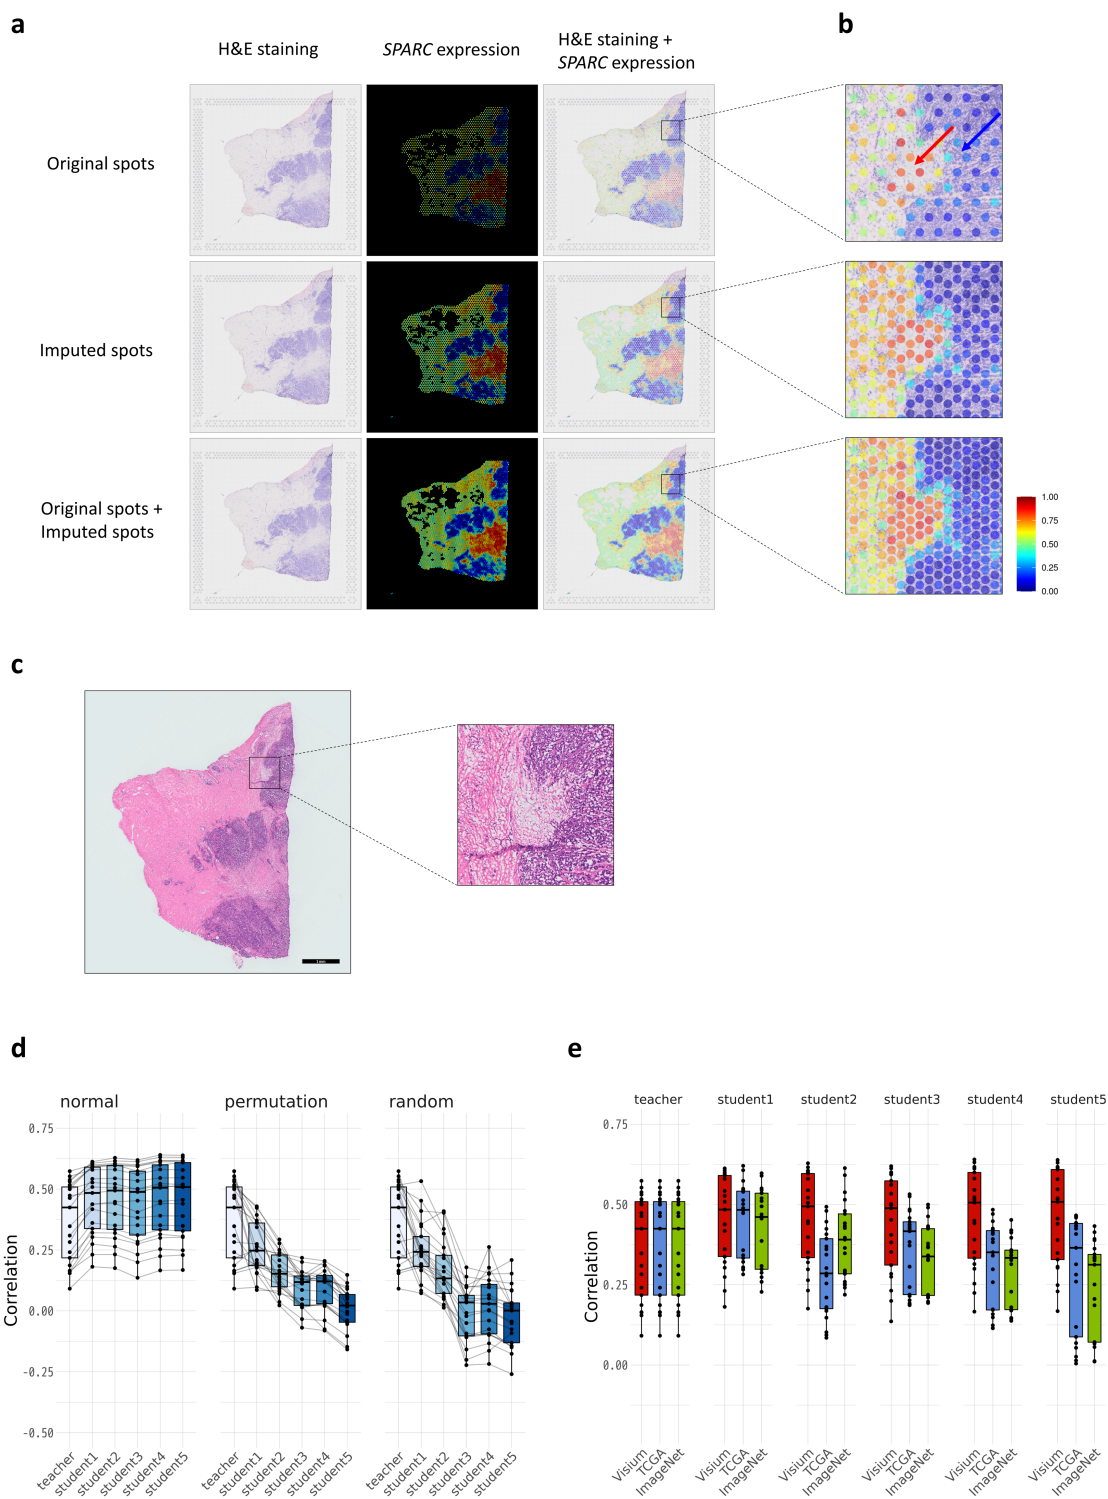

480

481

482 **Figure 3** Super-resolution and section imputation as practical applications of DeepSpaCE. Super-  
483 resolution of *SPARC* expression using DeepSpaCE highlights tumor invasion more clearly and semi-  
484 supervised learning for tissue section imputation using DeepSpaCE improves prediction accuracy.  
485 **(a)** Nine images show the super-resolved results for *SPARC* expression. Three images in the left  
486 column show section D2 after H&E staining. Three images in the middle column show the heatmaps  
487 of predicted *SPARC* expression by DeepSpaCE for the original spots (top), imputed spots (middle),  
488 and both original and imputed spots (bottom). Three images in the right column show overlays of  
489 predicted *SPARC* expression by DeepSpaCE and H&E staining for section D2. **(b)** Three enlarged  
490 images on the right area show tumor cell invasion (blue arrow) and the microenvironment (red  
491 arrow). Spot size is adjusted to smaller than the exact spot size of the Visium platform to show the  
492 background image. **(c)** Left image shows the H&E-stained section adjacent to section D2. Right  
493 enlarged image is the same region as **Fig.3b**. Enlarged image shows the invasion of tumor cells. **(d)**  
494 Box plots show Pearson's correlation coefficients between the measured and predicted gene-  
495 expression levels of 21 breast cancer-related microenvironment markers. Left box plot displays the  
496 results of semi-supervised learning, which showed increasing Pearson's correlation coefficients.  
497 Middle and right box plots show the semi-supervised learning results with permuted and  
498 randomized values. For the box plot, the box indicates the first and third quartiles; horizontal center  
499 line marks the medians; upper whisker extends from the hinge to the highest value that is within



500 1.5 × interquartile range (IQR) of the hinge; lower whisker extends from the hinge to the lowest  
501 value within 1.5 × IQR of the hinge; and data were plotted as points. Black lines between boxes  
502 connect the same gene. (e) Box plots show Pearson’s correlation coefficients between the  
503 measured and predicted gene-expression levels of 21 breast cancer-related microenvironment  
504 markers. Three types of image sets were compared for semi-supervised learning, namely sections  
505 A–C (red); data from The Cancer Genome Atlas (TCGA) (blue); and ImageNet data (green). For the  
506 box plot, the box indicates the first and third quartiles; horizontal center line marks the medians;  
507 upper whisker extends from the hinge to the highest value that is within 1.5 × IQR of the hinge;  
508 lower whisker extends from the hinge to the lowest value within 1.5 × IQR of the hinge; and data  
509 were plotted as points.  
510
